# Supplementary material
Source: PubMed Central journal article supplement (PMC4789495)
Supplement: NIHMS67405-supplement-Supplementary.pdf [file NIHMS67405-supplement-Supplementary.pdf]

revised Supplemental Fig. 1

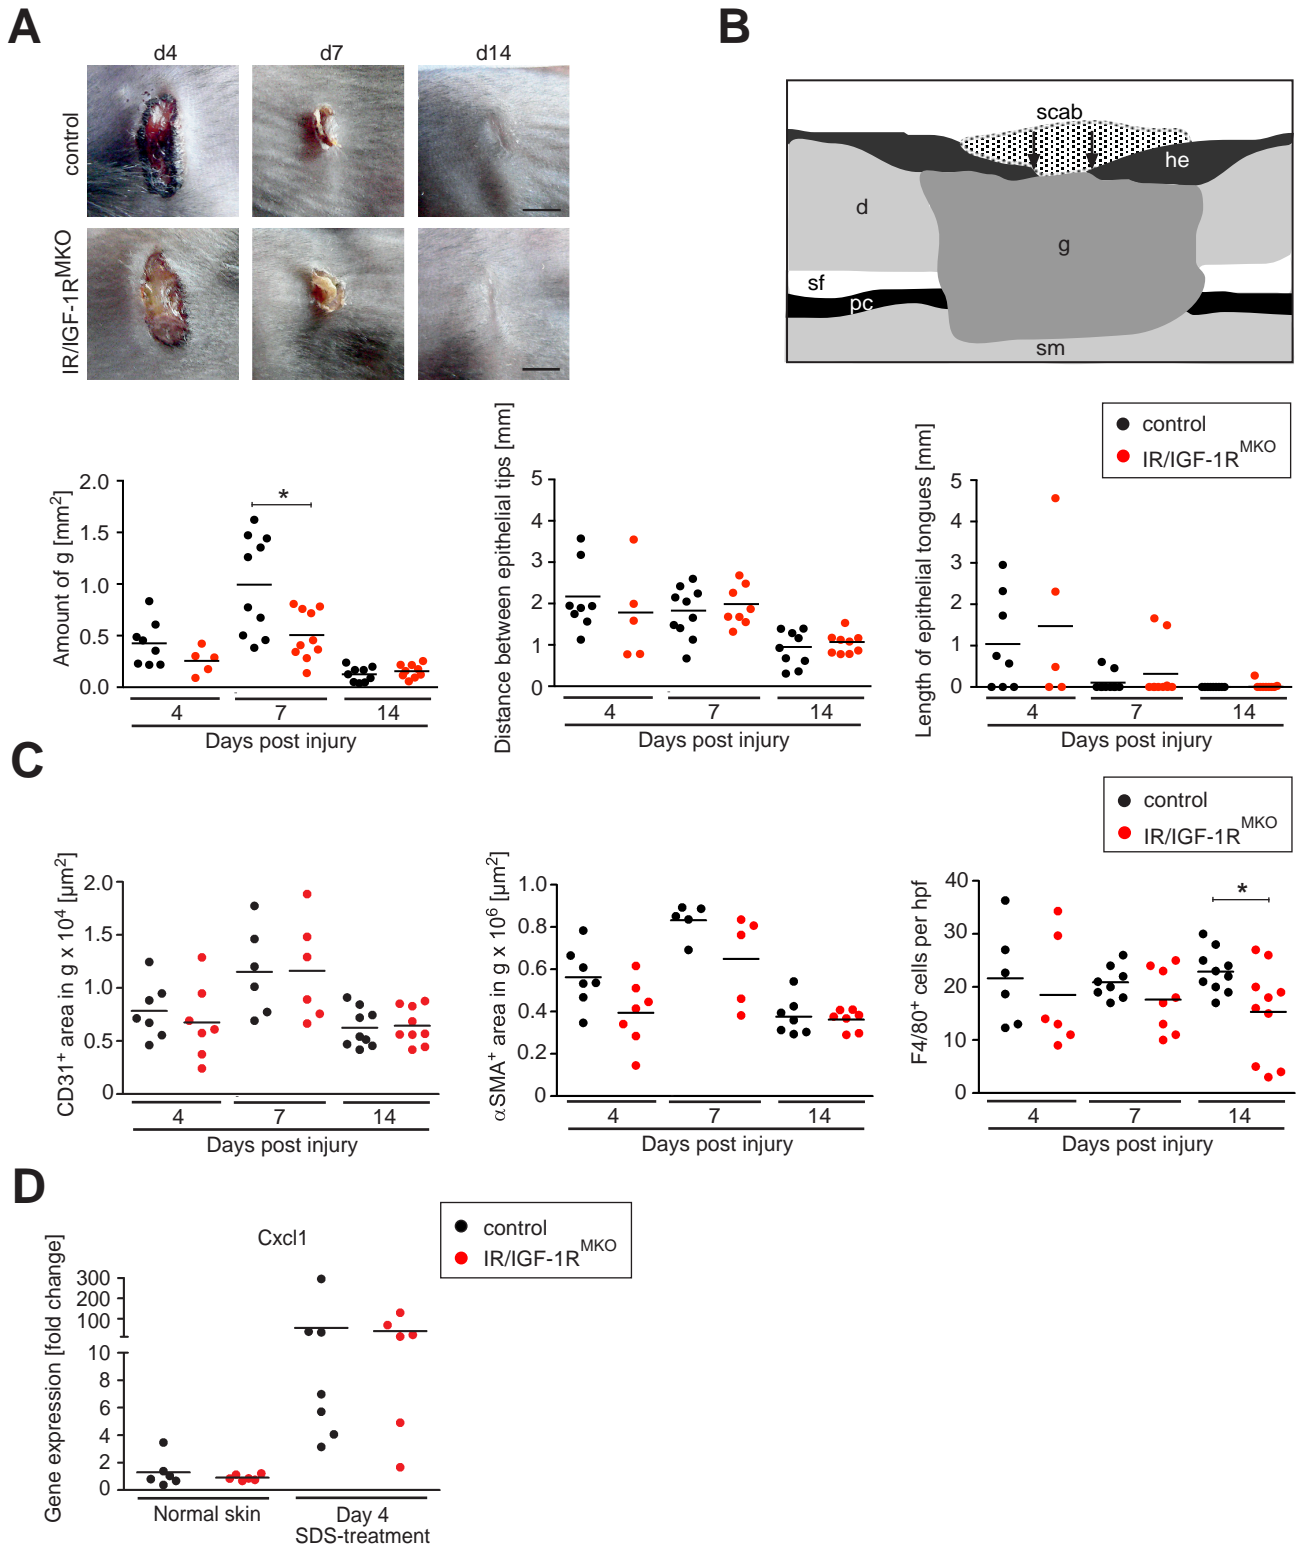

**Supplemental Fig. 1: Myeloid cell-restricted IR/IGF-1R deletion has no major impact on overall wound closure kinetics.** (A) Macroscopic appearance of wounds in IR/IGF-1R<sup>MKO</sup> and control mice at different time points post injury; scale bar indicates 5 mm. (B) Upper right, schema illustrating skin wound histology around day 4 post injury. Morphometric analysis of H&E stained wound sections in control and IR/IGF-1R<sup>MKO</sup> mice; e=epidermis, d=dermis, he=hyperproliferative epidermis, g=granulation tissue, pc=panniculus carnosus, sf=subcutaneous fat layer, sm=subcutaneous muscle layer. (C) Morphometric quantification of CD31<sup>+</sup>, αSMA<sup>+</sup> area or F4/80<sup>+</sup> cells (macrophages) within the granulation tissue at different time points post injury in IR/IGF-1R<sup>MKO</sup> and control mice. (D) Relative gene expression of Cxcl1 in unwounded skin and wound tissues post injury as indicated. Each dot represents one wound; data are expressed as mean; \* p-value < 0.05.

## revised Supplemental Fig. 2

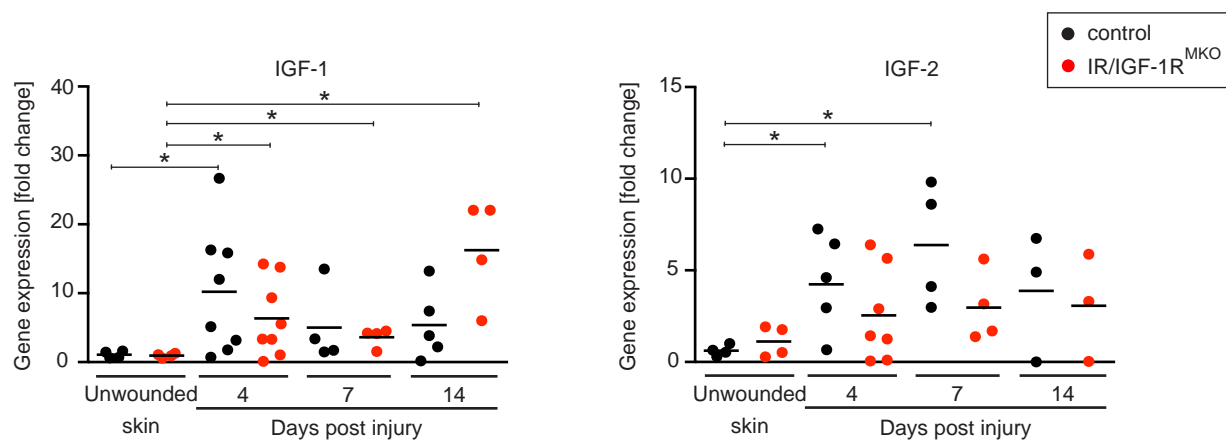

**Supplemental Fig. 2: Expression of IGF-1 and IGF-2 is induced during skin wound healing.** Relative gene expression of IGF-1 and IGF-2 in unwounded skin and wound tissues post injury as indicated; each dot represents one wound; \* p-value <0.05.

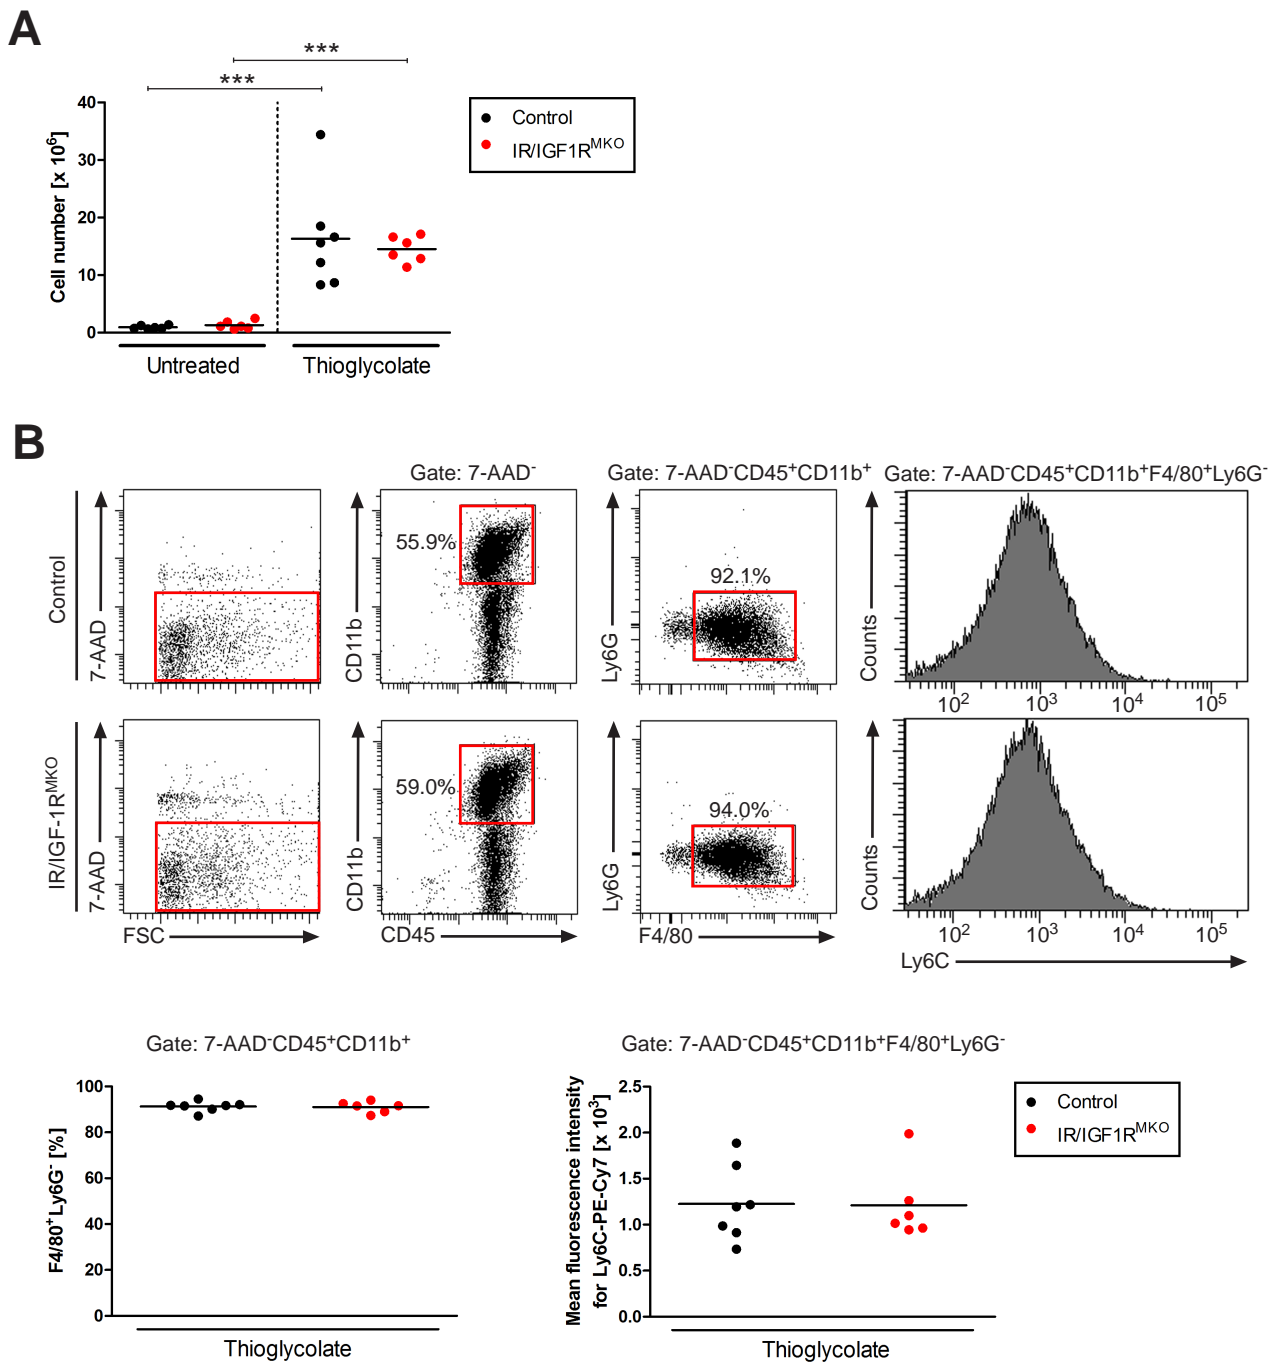

**Supplemental Fig. 3: IR/IGF-1R deficiency does not impact recruitment of macrophages into the peritoneal cavity after thioglycolate challenge.** (A) Numbers of peritoneal cells in untreated IR/IGF-1R<sup>MKO</sup> and control mice and 4 days after thioglycolate injection. (B) Upper panel, representative FACS analysis of peritoneal cells isolated from IR/IGF-1R<sup>MKO</sup> and control mice 4 days after thioglycolate injection. 7-AAD<sup>-</sup> cells were gated and analyzed for expression of CD45 and CD11b; 7-AAD<sup>-</sup>CD45<sup>+</sup>CD11b<sup>+</sup> cells were gated and analyzed for expression of F4/80 and Ly6G; 7-AAD<sup>-</sup>CD45<sup>+</sup>CD11b<sup>+</sup>F4/80<sup>+</sup>Ly6G<sup>-</sup> cells were gated and analyzed for expression of Ly6C. Lower panel, quantification of F4/80<sup>+</sup>Ly6G<sup>-</sup> macrophages in the gate of CD45<sup>+</sup>CD11b<sup>+</sup> cells and quantification of the mean fluorescence intensity of Ly6C-PE-Cy7 in the gate of 7-AAD<sup>-</sup>CD45<sup>+</sup>CD11b<sup>+</sup>F4/80<sup>+</sup>Ly6G<sup>-</sup> cells. PE-Cy7, phycoerythrin-cyanine7; each dot represents one mouse; data are expressed as mean; \*\*\* p-value <0.001

**Supplemental Table I: Primer pairs used in this study**

| Target gene    | Accession number | Primer sequence                                                                 |
|----------------|------------------|---------------------------------------------------------------------------------|
| IL-1 $\beta$   | NM_008361.3      | forward: 5' - GGACCCCAAAAGATGAAGGGCTGC<br>reverse: 5' - GCTCTTGTTGATGTGCTGCTGCG |
| IL-6           | NM_031168.1      | forward: 5' - ACACATGTTCTCTGGGAAATC<br>reverse: 5' - AAGTGCATCATCGTTGTTTCATACA  |
| iNOS           | NM_010927.3      | forward: 5' - CCACCTTGGTGAAGGGACTGAGCT<br>reverse: 5' - AGGGGCAAGCCATGTCTGAGACT |
| IL-10          | NM_010548.2      | forward: 5' - AGCCGGGAAGACAATAACTG<br>reverse: 5' - CATTTCCGATAAGGCTTGG         |
| GAPDH          | NM_008084.2      | forward: 5' - CATGTTTGTGATGGGTGTGA<br>reverse: 5' - AATGCCAAAGTTGTCATGGA        |
| IGF-1          | NM_010512.4      | forward: 5' - GCGGTGCCCTTGAGACTCC<br>reverse: 5' - CTGCGCATCCTCCCAAGTGC         |
| IGF-2          | NM_010514.3      | forward: 5' - CACGGGGGAGCCTCTTCGGA<br>reverse: 5' - TGGGGCAAGGGGAACAGCCT        |
| TNF $\alpha$   | NM_013693        | forward: 5' - GACCCTCACACTCAGATCATCTTCT<br>reverse: 5' - CCTCCACTTGGTGGTTTGCT   |
| MIP1 $\alpha$  | NM_011337.2      | forward: 5' - CATATGGAGCTGACACCCCG<br>reverse: 5' - CAGGAAAATGACACCTGGCTG       |
| MCP1           | NM_011333.3      | forward: 5' - TCCACGTGTTGGCTCAGCCAG<br>reverse: 5' - CCAGCCTACTCATTGGGATCATCTT  |
| MCP3           | NM_013654.3      | forward: 5' - GCCCAATGCATCCACATGCTGCT<br>reverse: 5' - TTCAGCGCAGACTTCCATGCCC   |
| Relm- $\alpha$ | NM_020509        | forward: 5' - TATGAACAGATGGGCCTCCT<br>reverse: 5' - GGCAGTTGCAAGTATCTCCAC       |
